# Supplementary material for: Genetic signatures of a demographic collapse in a large-bodied forest dwelling primate (Mandrillus leucophaeus)
Source: PubMed Central journal article supplement (PMC3399144; doi:10.1002/ece3.98), 2012-03

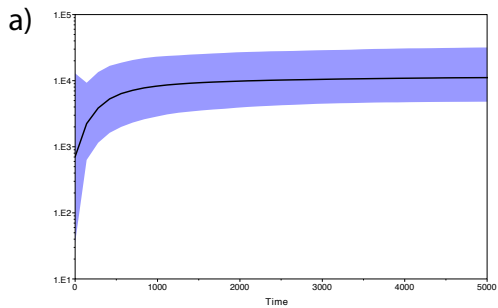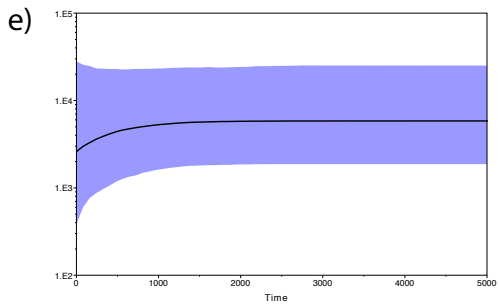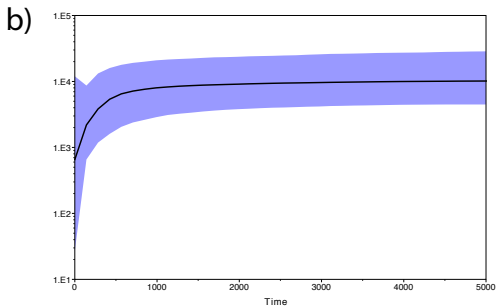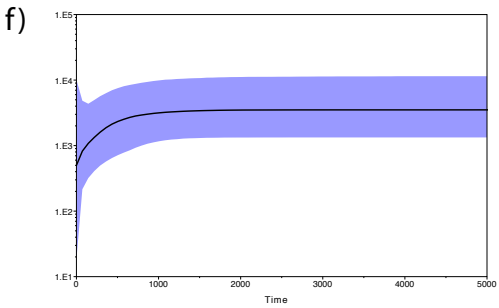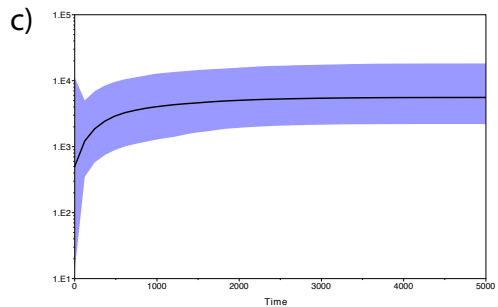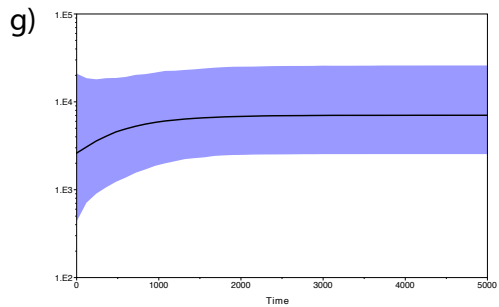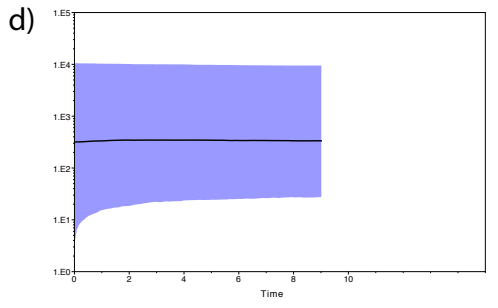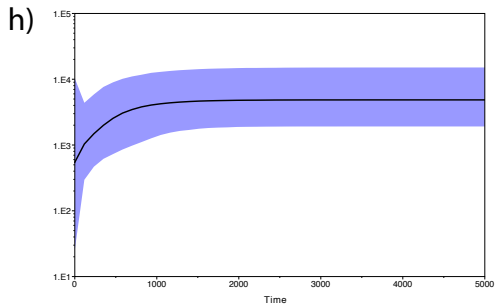

Supplement: ece30002-0550-SD2.pdf [file ece30002-0550-SD2.pdf]
